# Supplementary material for: Evaluation of Aerogel Spheres Derived from Salix psammophila in Removal of Heavy Metal Ions in Aqueous Solution
Source: MDPI journal article supplement (doi:10.3390/f13010061), 2022-01-04
Supplement: s1 [file s1]

Archive with 1 entries (1 files):
- forests-1470993-supplementary.pdf
